# Supplementary material
Source: ML conference proceedings conference paper supplement (https://proceedings.mlr.press/v139/saha21c.html)
Supplement: Supplementary file [file saha21c-supp.pdf]

## Supplementary: Pseudo-1d Bandit Convex Optimization

### A. Proofs

#### A.1. Proof of Theorem 1

*Proof. Problem instance construction.* Divide the time interval  $[T]$  into  $d$  equal length sub intervals (hence each of length  $\frac{T}{d}$ )  $T_1, \dots, T_d$ . Assume  $T_0 = \emptyset$ .

For  $i \in [d]$ : Choose  $\sigma_i \sim \text{Ber}(\pm 1)$ , and set  $\mathbf{x}_i = \mathbf{e}_i$ . Denote  $\boldsymbol{\sigma} = (\sigma_1, \dots, \sigma_d)$ .

At any time  $t \in T_i = \left\{ \frac{T}{d}(i-1) + 1, \dots, \frac{T}{d}i \right\}$ ,  $i \in [d]$ ,

1. Choose  $g_t(\mathbf{w}; \mathbf{x}_t) = \mathbf{w}^\top \mathbf{x}_t$ . Clearly  $\nabla_{\mathbf{w}}(g_t(\cdot; \mathbf{x}_t)) = \mathbf{x}_t \in \{0, 1\}^d$  which is revealed to the learner at the beginning of round  $t$ . We choose  $\mathbf{x}_t = \mathbf{x}_i$ .
2. Loss function  $f_t(\mathbf{w}) = \ell_t(\mathbf{w}^\top \mathbf{x}_t) + \varepsilon_t = \mu\sigma_i(\mathbf{w}^\top \mathbf{x}_i) + \varepsilon_t$ , where  $\varepsilon_t \sim \mathcal{N}(0, \frac{1}{16})$ , for some constant  $\mu > 0$  (to be decided later),  $\forall \mathbf{w} \in \mathcal{W}$ .
3. Learner plays  $\mathbf{w}_t = [\mathbf{w}_t(1), \dots, \mathbf{w}_t(d)] \in \mathcal{W}$ .

Denote  $\bar{\mathbf{w}}_i := \frac{1}{T_d} \sum_{t \in T_i} \mathbf{w}_t$ , where  $T_d = \frac{T}{d}$ .

**Remark 10 (Optimum Point).** Note for any fixed  $\mathbf{w} \in \mathcal{W}$ , the total expected loss is  $\mathbb{E} \left[ \sum_{i=1}^d \sum_{t \in T_i} f_t(\mathbf{w}) \right] = \frac{\mu T}{d} \sum_{i=1}^d (\sigma_i \mathbf{x}_i^\top) \mathbf{w} = \frac{T}{d} (\tilde{\boldsymbol{\sigma}}^\top \mathbf{w})$ , where  $\tilde{\sigma}(i) = \mu\sigma_i$ ,  $\forall i \in [d]$ . Thus clearly the best point (i.e. the minimizer)  $\mathbf{w}^* = -\frac{\boldsymbol{\sigma}}{\sqrt{d}}$ . Note  $\mathbf{w}^* \in \mathcal{W}$ .

The expected regret of any  $\mathcal{A}$ :

$$\begin{aligned}
 \mathbb{E}[R_T] &= \sum_{i=1}^d \sum_{t \in T_i} \mu [(\sigma_i \mathbf{x}_i^\top) \mathbf{w}_t - (\sigma_i \mathbf{x}_i^\top) \mathbf{w}^*] = \sum_{i=1}^d \mu T_d [\mathbb{E}[\sigma_i \mathbf{x}_i^\top \bar{\mathbf{w}}_i] - (\sigma_i \mathbf{x}_i^\top) \mathbf{w}^*] \\
 &= \sum_{i=1}^d T_d \mathbb{E} \left[ \mu \sigma(i) [\bar{\mathbf{w}}_i(i) - \mathbf{w}^*(i)] \right] \\
 &= \sum_{i=1}^d T_d \mathbb{E} \left[ \mu \sqrt{d} \mathbf{w}^*(i) [\mathbf{w}^*(i) - \bar{\mathbf{w}}_i(i)] \right] = \sum_{i=1}^d T_d \mathbb{E} \left[ \mu \sqrt{d} \left( (\mathbf{w}^*(i))^2 - \bar{\mathbf{w}}_i(i) \mathbf{w}^*(i) \right) \right] \\
 &= \sum_{i=1}^d T_d \mathbb{E} \left[ \mu \sqrt{d} \left( \frac{1}{d} + \frac{\sigma_i}{\sqrt{d}} \bar{\mathbf{w}}_i(i) \right) \right] \\
 &= \sum_{i=1}^d T_d \left[ \frac{2\mu}{\sqrt{d}} \Pr(\sigma_i \bar{\mathbf{w}}_i(i) > 0) \right] \text{ since } \bar{\mathbf{w}}_i(i) \in \{-1/\sqrt{d}, 1/\sqrt{d}\} \tag{7}
 \end{aligned}$$

Now for any  $i \in [d]$ :

$$\begin{aligned}
 \Pr(\sigma_i \bar{\mathbf{w}}_i(i) > 0) &= \frac{1}{2} \Pr(\bar{\mathbf{w}}_i(i) > 0 \mid \sigma_i = +1) + \frac{1}{2} \Pr(\bar{\mathbf{w}}_i(i) < 0 \mid \sigma_i = -1) \\
 &= \frac{1}{2} \left( \Pr(\bar{\mathbf{w}}_i(i) > 0 \mid \sigma_i = +1) + 1 - \Pr(\bar{\mathbf{w}}_i(i) > 0 \mid \sigma_i = -1) \right) \\
 &\geq \frac{1}{2} \left( 1 - |\Pr(\bar{\mathbf{w}}_i(i) > 0 \mid \sigma_i = +1) - \Pr(\bar{\mathbf{w}}_i(i) > 0 \mid \sigma_i = -1)| \right),
 \end{aligned}$$

**Assumption 1.** For proving the lower bound we assume that  $\bar{\mathbf{w}}_i(i)$  is a deterministic function of the observed function values  $\{f_t\}_{t \in T_i}$ , respectively at  $\{\mathbf{w}_t\}_{t \in T_i}$ . Note that this assumption is without loss of generality, since any random querying strategy can be seen as a randomization over deterministic querying strategies. Thus, a lower bound which holds uniformly for any deterministic querying strategy would also hold over a randomization. Let us denote:  $f([T_i]) = \{f_t\}_{t \in T_i}$ .

Then since the randomness of  $\bar{\mathbf{w}}_i(i)$  only depends on  $f([T_i])$ , applying Pinsker's inequality, we get:

$$\begin{aligned} Pr(\sigma_i \bar{\mathbf{w}}_i(i) > 0) &\geq \frac{1}{2} \left( 1 - |Pr(\sigma_i \bar{\mathbf{w}}_i(i) > 0 \mid \sigma_i = +1) - Pr(\sigma_i \bar{\mathbf{w}}_i(i) < 0 \mid \sigma_i = -1)| \right) \\ &\geq \frac{1}{2} \left( 1 - \sqrt{2KL(P(f([T_i]) \mid \sigma_i = +1) \parallel P(f([T_i]) \mid \sigma_i = -1))} \right) \end{aligned}$$

and further applying the chain rule of KL-divergence, we have:

$$\begin{aligned} Pr(\sigma_i \bar{\mathbf{w}}_i(i) > 0) &\geq \frac{1}{2} \left( 1 - \sqrt{2 \sum_{t \in T_i} KL(P(f_t \mid \sigma_i = +1, \{f_\tau\}_{\tau \in [t-1] \setminus T_{i-1}}) \parallel P(f_t \mid \sigma_i = -1, \{f_\tau\}_{\tau \in [t-1] \setminus T_{i-1}}))} \right) \\ &\geq \frac{1}{2} \left( 1 - \sqrt{2 \sum_{t \in T_i} \frac{4\mu^2 \sigma_i^2 \mathbf{w}_t(i)^2}{\frac{2}{16}}} \right) = \frac{1}{2} \left( 1 - \sqrt{\frac{64\mu^2 T_d}{d}} \right) \text{ since } \mathbf{w}_t(i)^2 = \frac{1}{d} \text{ and } \sigma_i^2 = 1 \end{aligned}$$

where the last inequality follows by noting  $P(f_t \mid \sigma_i, \{f_\tau\}_{\tau \in [t-1] \setminus T_{i-1}}) \sim \mathcal{N}(\mu \sigma_i \mathbf{w}_t(i), \frac{1}{16})$ , and  $KL(\mathcal{N}(\mu_1, \sigma^2) \parallel \mathcal{N}(\mu_2, \sigma^2)) = \frac{(\mu_1 - \mu_2)^2}{2\sigma^2}$  (for bounding the each individual KL-divergence terms).

**Case 1** ( $d \leq 16\sqrt{T}$ )

Combining the above claims with Eq. (7):

$$\begin{aligned} \mathbb{E}[R_T] &= \sum_{i=d} T_d \left[ \frac{2\mu}{\sqrt{d}} Pr(\sigma_i \bar{\mathbf{w}}_i(i) > 0) \right] \geq \sum_{i=d} T_d \left[ \frac{\mu}{\sqrt{d}} (1 - 8\mu \sqrt{\frac{T_d}{d}}) \right], \\ &\geq \sum_{i=d} T_d \frac{1}{16\sqrt{T_d}} \left( 1 - \frac{1}{2} \right) \left( \text{setting } \mu = \frac{\sqrt{d}}{16\sqrt{T_d}} \leq 1 \right) = \frac{\sqrt{dT}}{32}. \end{aligned}$$

Note that for any  $t \in [T]$ ,  $f_t$  s are 1-lipschitz for  $d \leq 16\sqrt{T}$ , as desired to understand the dependency of lower bound to the lipschitz constant.

**Case 2** ( $d > 16\sqrt{T}$ )

In this case  $T < \frac{d^2}{256}$ . Let us denote  $d' = 16\sqrt{T} < d$ , and let us use the above problem construction for dimension  $d'$  (we can simply ignore decision coordinates  $\mathbf{w}(d'+1), \dots, \mathbf{w}(d)$ , i.e. for any  $\mathbf{w} \in \mathcal{W} \subseteq \mathbb{R}^d$ , denoting  $\mathbf{w}_{[d']} = (\mathbf{w}_1, \dots, \mathbf{w}_{d'})$ , we can construct  $f_t(\mathbf{w}) = f_t(\mathbf{w}_{[d']})$ ).

Now for the above problem suppose there exists an algorithm  $\mathcal{A}$  such that  $\mathbb{E}[R_T(\mathcal{A})] \leq \frac{\sqrt{dT}}{32} = \frac{T^{3/4}}{32}$ , then this violates the lower bound derived in **Case 1**. Thus the lower bound for **Case 2** is must be at least  $\frac{T^{3/4}}{32}$ .

Combining the lower bounds of **Case 1 and 2** concludes the proof.  $\square$

## A.2. Proof of Lemma 5 and additional claims

**Useful definitions and notation.** Before proceeding to the proof, we define relevant notation that will be used throughout this section. For the kernel  $\mathbf{K}'_t$  (Definition 4), we define a linear operator  $\mathbf{K}'_{t*}$  on the space of functions  $\mathcal{G}_t \mapsto \mathbb{R}$  as follows. For any function  $\ell : \mathcal{G}_t \mapsto \mathbb{R}$ :

$$\mathbf{K}'_{t*} \ell(y) := \int_{y' \in \mathcal{G}_t} \ell(y') \mathbf{K}'_t(y', y) dy \quad \forall y \in \mathcal{G}_t, \quad (8)$$

We also denote by  $\mathcal{P}$  and  $\mathcal{Q}_t$  the set of all probability measures on  $\mathcal{W}$  and  $\mathcal{G}_t$  respectively; and by  $\delta_y \in \mathcal{Q}_t$ ,  $\delta_{\mathbf{w}} \in \mathcal{P}$  the dirac mass at  $y \in \mathcal{G}_t$  and at  $\mathbf{w} \in \mathcal{W}$  respectively. For  $\mathbf{q} \in \mathcal{Q}_t$ , define:

$$\langle \mathbf{q}, \ell \rangle = \int_{y \in \mathcal{G}_t} \ell(y) \mathbf{q}(y) dy$$

As noted in (Bubeck et al., 2017), a useful observation on the operator (8) is that for any  $\mathbf{q} \in \mathcal{Q}_t$ :

$$\langle \mathbf{K}'_t \mathbf{q}, \ell_t \rangle = \langle \mathbf{K}'^*_t \ell_t, \mathbf{q} \rangle. \quad (9)$$

### Proof of Lemma 5.

*Proof.* For ease, we abbreviate  $g_t(\mathbf{w}_t; \mathbf{x}_t)$  as  $g_t(\mathbf{w}_t)$  throughout the proof. We start by analyzing the expected regret w.r.t. the optimal point  $\mathbf{w}^* \in \mathcal{W}$  (denote  $y_t^* = g_t(\mathbf{w}^*)$  for all  $t \in [T]$ ). Define  $\forall y \in \mathcal{G}_t$ ,  $\tilde{\ell}_t(y) := \tilde{f}_t(\mathbf{w})$ , for any  $\mathbf{w} \in \mathcal{W}(y)$ . Also let  $\mathcal{H}_t = \sigma(\{\mathbf{x}_\tau, \mathbf{p}_\tau, \mathbf{w}_\tau, f_\tau\}_{\tau=1}^{t-1} \cup \{\mathbf{x}_t, \mathbf{p}_t\})$  denote the sigma algebra generated by the history till time  $t$ . Then the expected cumulative regret of Algorithm 2 over  $T$  time steps can be bounded as:

$$\begin{aligned} \mathbb{E}[R_T(\mathbf{w}^*)] &:= \mathbb{E}\left[\sum_{t=1}^T (f_t(\mathbf{w}_t) - f_t(\mathbf{w}^*))\right] = \mathbb{E}\left[\sum_{t=1}^T (\ell_t(g_t(\mathbf{w}_t)) - \ell_t(g_t(\mathbf{w}^*)))\right] \\ &= \mathbb{E}\left[\sum_{t=1}^T (\ell_t(y_t) - \ell_t(y_t^*))\right] = \mathbb{E}\left[\sum_{t=1}^T \langle \mathbf{K}'_t \mathbf{q}_t - \delta_{y_t^*}, \ell_t \rangle\right] \quad [\text{since } y_t \sim K'_t \mathbf{q}_t] \\ &\leq \mathbb{E}\left[\sum_{t=1}^T \frac{3\epsilon L}{\lambda} + \frac{1}{\lambda} \langle \mathbf{K}'_t (\mathbf{q}_t - \delta_{y_t^*}), \ell_t \rangle\right] \quad [\text{from Property\#2 of Lemma 11}] \\ &\leq 6\epsilon LT + 2 \sum_{t=1}^T \mathbb{E}\left[\langle \mathbf{K}'_t (\mathbf{q}_t - \delta_{y_t^*}), \ell_t \rangle\right] \quad [\text{we can choose } \lambda = 1/2, \text{ see proof of Lemma 11}] \\ &\stackrel{\text{by (9)}}{=} 6\epsilon LT + 2 \sum_{t=1}^T \mathbb{E}\left[\sum_{t=1}^T \langle \mathbf{K}'^*_t \ell_t, (\mathbf{q}_t - \delta_{y_t^*}) \rangle\right] \\ &\stackrel{(a)}{=} 6\epsilon LT + 2 \sum_{t=1}^T \mathbb{E}\left[\sum_{t=1}^T \mathbb{E}_{y_t \sim \mathbf{K}'_t \mathbf{q}_t} [\langle \mathbf{q}_t - \delta_{y_t^*}, \tilde{\ell}_t \rangle \mid \mathcal{H}_t]\right] \\ &= 6\epsilon LT + 2 \sum_{t=1}^T \mathbb{E}\left[\sum_{t=1}^T \mathbb{E}_{y_t \sim \mathbf{K}'_t \mathbf{q}_t} [\langle \mathbf{p}_t - \delta_{\mathbf{w}^*}, \tilde{f}_t \rangle \mid \mathcal{H}_t]\right] \end{aligned} \quad (10)$$

where the last equality follows by Lemma 9, and by  $\langle \delta_{\mathbf{w}^*}, \tilde{f}_t \rangle = \tilde{f}_t(\mathbf{w}^*) = \tilde{\ell}_t(y_t^*) = \langle \delta_{y_t^*}, \tilde{\ell}_t \rangle$ ; the penultimate equality (a) follows noting that for any  $y' \in \mathcal{G}_t$ :

$$\mathbb{E}_{y_t \sim \mathbf{K}'_t \mathbf{q}_t} [\tilde{\ell}_t(y')] = \int_{y_t \in \mathcal{G}_t} \mathbf{K}'_t \mathbf{q}_t(y_t) \frac{\ell_t(y_t)}{\mathbf{K}'_t \mathbf{q}_t(y_t)} \mathbf{K}'_t(y_t, y') dy_t = \int_{y_t \in \mathcal{G}_t} \ell_t(y_t) \mathbf{K}'_t(y_t, y') dy_t = \mathbf{K}'^*_t \ell_t(y').$$

Let us denote by  $\mathbf{p}^*$  a uniform measure on the set  $\mathcal{W}_\kappa := \{\mathbf{w} \mid \mathbf{w} = (1 - \kappa)\mathbf{w}^* + \kappa\mathbf{w}', \text{ for any } \mathbf{w}' \in \mathcal{W}\}$  for some  $\kappa \in (0, 1)$ . Note, this implies  $\mathbf{p}^*(\mathbf{w}) = \begin{cases} \frac{1}{\kappa^d \text{vol}(\mathcal{W})}, & \text{if } \mathbf{w} \in \mathcal{W}_\kappa \\ 0 & \text{otherwise} \end{cases}$ .

Then note that:

$$\begin{aligned} \sum_{t=1}^T \mathbb{E}_{y_t \sim \mathbf{K}'_t \mathbf{q}_t} \langle \mathbf{p}_t - \delta_{\mathbf{w}^*}, \tilde{f}_t \rangle &= \sum_{t=1}^T \mathbb{E}_{y_t \sim \mathbf{K}'_t \mathbf{q}_t} [\langle \mathbf{p}_t, \tilde{f}_t \rangle - \langle \delta_{\mathbf{w}^*}, \tilde{f}_t \rangle] \\ &\stackrel{(a)}{=} \sum_{t=1}^T \mathbb{E}_{y_t \sim \mathbf{K}'_t \mathbf{q}_t} [\langle \mathbf{p}_t, \tilde{f}_t \rangle] - \mathbf{K}'^*_t \ell_t(g_t(\mathbf{w}^*)) \end{aligned}$$

$$\begin{aligned}
&\stackrel{(b)}{\leq} \sum_{t=1}^T \mathbb{E}_{y_t \sim \mathbf{K}'_t \mathbf{q}_t} [\langle \mathbf{p}_t, \tilde{f}_t \rangle] + \sum_{t=1}^T \left[ \kappa LDW - \langle \mathbf{p}^*, \mathbf{K}'_t \ell_t(g_t(\cdot)) \rangle \right] \\
&= \sum_{t=1}^T \mathbb{E}_{y_t \sim \mathbf{K}'_t \mathbf{q}_t} [\langle \mathbf{p}_t, \tilde{f}_t \rangle - \langle \mathbf{p}^*, \tilde{f}_t \rangle] + \kappa LDWT
\end{aligned}$$

where (a) follows since  $\mathbb{E}_{y_t \sim \mathbf{K}'_t \mathbf{q}_t} \langle \delta_{\mathbf{w}^*}, \tilde{f}_t \rangle = \mathbb{E}_{y_t \sim \mathbf{K}'_t \mathbf{q}_t} [\tilde{f}_t(\mathbf{w}^*)] = \mathbb{E}_{y_t \sim \mathbf{K}'_t \mathbf{q}_t} [\tilde{\ell}_t(g_t(\mathbf{w}^*))] = \mathbf{K}'_t \ell_t(g_t(\mathbf{w}^*))$  as shown above; (b) follows since by assumption  $g_t$  is  $D$  lipschitz and so by definition of  $\mathcal{W}_\kappa$  for any  $\mathbf{w} \in \mathcal{W}_\kappa$  we have  $|g_t(\mathbf{w}) - g_t(\mathbf{w}^*)| \leq DW$  (since  $W = \text{Diam}(\mathcal{W})$ ). But from the Property #1 of Lemma 11 we have that the function  $\mathbf{K}'_t \ell_t(\cdot)$  is  $L$ -lipschitz, which in turn implies for any  $\mathbf{w} \in \mathcal{W}_\kappa$ ,  $|\mathbf{K}'_t \ell_t(g_t(\mathbf{w})) - \mathbf{K}'_t \ell_t(g_t(\mathbf{w}^*))| \leq L|g_t(\mathbf{w}) - g_t(\mathbf{w}^*)| \leq \kappa LDW$ . The last equality follows by applying the reverse logic used for (a).

Combining above claims with (10) we further get:

$$\mathbb{E}[R_T(\mathbf{w}^*)] \leq 6\epsilon LT + 2 \left( \kappa LDWT + \mathbb{E} \left[ \sum_{t=1}^T \mathbb{E}_{y_t \sim \mathbf{K}'_t \mathbf{q}_t} [\langle \mathbf{p}_t - \mathbf{p}^*, \tilde{f}_t \rangle \mid \mathcal{H}_t] \right] \right). \quad (11)$$

From Lemma 10 we get:

$$\sum_{t=1}^T \langle \mathbf{p}_t - \mathbf{p}^*, \tilde{f}_t \rangle \leq \frac{KL(\mathbf{p}^* \parallel \mathbf{p}_1)}{\eta} + \frac{\eta}{2} \langle \mathbf{p}_t, \tilde{f}_t^2 \rangle = \frac{KL(\mathbf{p}^* \parallel \mathbf{p}_1)}{\eta} + \frac{\eta}{2} \langle \mathbf{q}_t, \tilde{\ell}_t^2 \rangle, \quad (12)$$

where the equality  $\langle \mathbf{p}_t, \tilde{f}_t^2 \rangle = \langle \mathbf{q}_t, \tilde{\ell}_t^2 \rangle$  follows from a similar derivation as shown in Lemma 9. Now, note that:

$$\begin{aligned}
\mathbb{E}_{y_t \sim \mathbf{K}'_t \mathbf{q}_t} [\langle \mathbf{q}_t, \tilde{\ell}_t^2 \rangle] &= \int_{y_t \in \mathcal{G}_t} \mathbf{K}'_t \mathbf{q}_t(y_t) \langle \mathbf{q}_t, \tilde{\ell}_t^2 \rangle dy_t \\
&= \int_{y_t \in \mathcal{G}_t} \mathbf{K}'_t \mathbf{q}_t(y_t) \left[ \int_{y \in \mathcal{G}_t} \mathbf{q}_t(y) \frac{(\ell_t(y))^2}{(\mathbf{K}'_t \mathbf{q}_t(y))^2} (\mathbf{K}'_t(y_t, y))^2 dy \right] dy_t \\
&\leq C^2 \int_{y_t \in \mathcal{G}_t} \frac{\mathbf{K}'_t^{(2)} \mathbf{q}_t(y_t)}{\mathbf{K}'_t \mathbf{q}_t(y_t)} dy_t \leq BC^2,
\end{aligned} \quad (13)$$

where the last inequality follows from Property #3 of Lemma 11 with  $B = 2 \left( 1 + \ln \frac{1}{\epsilon} + \ln (\beta_{\mathcal{W}} - \alpha_{\mathcal{W}}) \right)$ .

Finally, by definition of  $\mathbf{p}^*$ , we can bound the KL divergence term as:

$$KL(\mathbf{p}^* \parallel \mathbf{p}_1) = d \log \frac{1}{\kappa} \quad (14)$$

Substituting (13) and (14) in (12), letting  $L' = LDW$ , and setting  $\kappa = \frac{1}{L'T}$ ,  $\epsilon = \frac{1}{3L'T}$ , (11) yields:

$$\begin{aligned}
\mathbb{E}[R_T(\mathbf{w}^*)] &\leq 2 + 2 \left( 1 + \frac{KL(\mathbf{p}^* \parallel \mathbf{p}_1)}{\eta} + \frac{\eta}{2} \mathbb{E} \left[ \sum_{t=1}^T \mathbb{E}_{y_t \sim \mathbf{K}'_t \mathbf{q}_t} \langle \mathbf{q}_t, \tilde{\ell}_t^2 \rangle \mid \mathcal{H}_t \right] \right) \\
&= 4 + 2 \left( \frac{d \log L'T}{\eta} + \frac{\eta BC^2 T}{2} \right) \\
&= 4 + 2\sqrt{2} \left( \sqrt{d BC^2 T \log(L'T)} \right),
\end{aligned}$$

where the last equality follows by choosing  $\eta = \left( \frac{2d \log(L'T)}{BC^2 T} \right)^{\frac{1}{2}}$ . This concludes the proof.  $\square$

**Statements and proofs of additional lemmas used above:**

**Lemma 8.** In Algorithm 2, at any round  $t$ , both  $\mathbf{q}_t \in \mathcal{Q}_t$  and  $\mathbf{K}'_t \mathbf{q}_t \in \mathcal{Q}_t$ .

*Proof.* Firstly note that,  $\mathbf{p}_1 \in \mathcal{P}$  simply by its initialization, and for any subsequent iteration  $t = 2, 3, \dots, T$ ,  $\mathbf{p}_t \in \mathcal{P}$  by its update rule.

Now for any  $t \in [T]$  and  $y \in \mathcal{G}_t$ , by definition  $\mathbf{q}_t(y) > 0$ , as  $\mathbf{p}_t \in \mathcal{P}$ . The only remaining thing to prove is that  $\int_{\mathcal{G}_t} d\mathbf{q}_t(y) = 1$ , which simply follows as:

$$\int_{y \in \mathcal{G}_t} \mathbf{q}_t(y) dy = \int_{y \in \mathcal{G}_t} \int_{\mathcal{W}_t(y)} \mathbf{p}_t(\mathbf{w}) d\mathbf{w} = \int_{\mathcal{W}} \mathbf{p}_t(\mathbf{w}) d\mathbf{w} = 1 \quad [\text{since } \mathbf{p}_t \in \mathcal{P}].$$

Now, consider  $\mathbf{K}'_t \mathbf{q}_t$ . By definition,  $\forall y \in \mathcal{G}_t, \mathbf{K}'_t \mathbf{q}_t(y) = \int_{\mathcal{G}_t} \mathbf{K}'_t(y, y') d\mathbf{q}_t(y') > 0$  since by construction  $\mathbf{K}'_t(y, \cdot) > 0$  and  $\mathbf{q}_t \in \mathcal{Q}_t$ . Further, since  $\int_{\mathcal{G}_t} \mathbf{K}'_t(y, y') dy = 1$  for every  $y' \in \mathcal{G}_t$  (by construction), it is easy to show  $\int_{\mathcal{G}_t} \mathbf{K}'_t \mathbf{q}_t(y) dy = 1$  as follows:

$$\int_{\mathcal{G}_t} \mathbf{K}'_t \mathbf{q}_t(y) dy = \int_{\mathcal{G}_t} \left[ \int_{\mathcal{G}_t} \mathbf{K}'_t(y, y') d\mathbf{q}_t(y') \right] dy = \int_{\mathcal{G}_t} \left[ \int_{\mathcal{G}_t} \mathbf{K}'_t(y, y') dy \right] d\mathbf{q}_t(y') = \int_{\mathcal{G}_t} d\mathbf{q}_t(y') = 1.$$

□

**Lemma 9.** At any round  $t \in [T]$  of Algorithm 2,  $\langle \mathbf{p}_t, \tilde{f}_t \rangle = \langle \mathbf{q}_t, \tilde{\ell}_t \rangle$ .

*Proof.* The claim follows from the straightforward analysis:

$$\begin{aligned} \langle \mathbf{p}_t, \tilde{f}_t \rangle &= \int_{\mathbf{w} \in \mathcal{W}} \mathbf{p}_t(\mathbf{w}) \tilde{f}_t(\mathbf{w}) d\mathbf{w} = \int_{y \in \mathcal{G}_t} \int_{\mathbf{w} \in \mathcal{W}_t(y)} \mathbf{p}_t(\mathbf{w}) \tilde{f}_t(\mathbf{w}) d\mathbf{w} \\ &= \int_{y \in \mathcal{G}_t} \int_{\mathbf{w} \in \mathcal{W}_t(y)} \mathbf{p}_t(\mathbf{w}) \tilde{\ell}_t(y) d\mathbf{w} = \int_{y \in \mathcal{G}_t} \tilde{\ell}_t(y) \int_{\mathbf{w} \in \mathcal{W}_t(y)} \mathbf{p}_t(\mathbf{w}) d\mathbf{w} \\ &= \int_{y \in \mathcal{G}_t} \tilde{\ell}_t(y) \mathbf{q}_t(y) dy = \langle \mathbf{q}_t, \tilde{\ell}_t \rangle. \end{aligned}$$

□

**Lemma 10.** Consider any sequence of functions  $f_1, f_2, \dots, f_T$  such that  $f_t : \mathcal{D} \mapsto \mathbb{R}$  for all  $t \in [T]$ ,  $\mathcal{D} \subset \mathbb{R}^d$  for some  $d \in \mathbb{N}_+$ . Suppose  $\mathcal{P}$  denotes the set of probability measure over  $\mathcal{D}$ . Then for any  $\mathbf{p} \in \mathcal{P}$ , and given any  $\mathbf{p}_1 \in \mathcal{P}$ , the sequence  $\{\mathbf{p}_t\}_{t=2}^T$  is defined as  $\mathbf{p}_{t+1}(\mathbf{w}) := \frac{\mathbf{p}_t(\mathbf{w}) \exp(-\eta f_t(\mathbf{w}))}{\int_{\tilde{\mathbf{w}}} \mathbf{p}_t(\tilde{\mathbf{w}}) \exp(-\eta f_t(\tilde{\mathbf{w}})) d\tilde{\mathbf{w}}}$ , for all  $\mathbf{w} \in \mathcal{D}$ . Then it can be shown that:

$$\sum_{t=1}^T \langle \mathbf{p}_t - \mathbf{p}, f_t \rangle \leq \frac{KL(\mathbf{p} \parallel \mathbf{p}_1)}{\eta} + \frac{\eta}{2} \sum_{t=1}^T \langle \mathbf{p}_t, f_t^2 \rangle,$$

where  $KL(\mathbf{p} \parallel \mathbf{p}_1)$  denotes the KL-divergence between the two probability distributions  $\mathbf{p}$  and  $\mathbf{p}_1$ .

*Proof.* We start by noting that by definition of KL-divergence:

$$KL(\mathbf{p} \parallel \mathbf{p}_t) - KL(\mathbf{p} \parallel \mathbf{p}_{t+1}) = \int_{\mathcal{W}} \mathbf{p}(\mathbf{w}) \ln \left( \frac{\mathbf{p}_{t+1}(\mathbf{w})}{\mathbf{p}_t(\mathbf{w})} \right) d\mathbf{w}.$$

Moreover, by definition of  $\mathbf{p}_{t+1}$ ,  $\frac{1}{\eta} \left( KL(\mathbf{p} \parallel \mathbf{p}_t) - KL(\mathbf{p} \parallel \mathbf{p}_{t+1}) \right) = \frac{1}{\eta} \left( \int_{\mathcal{W}} \mathbf{p}(\mathbf{w}) \ln \left( \frac{\mathbf{p}_{t+1}(\mathbf{w})}{\mathbf{p}_t(\mathbf{w})} \right) \right) = -\mathbb{E}_{\mathbf{p}}[f_t(\mathbf{w})] - \frac{1}{\eta} \ln \mathbb{E}_{\mathbf{p}_t}[e^{-\eta f_t(\mathbf{w})}]$  for any  $t = 1, 2, \dots, T$ . Then summing over  $T$  rounds,

$$\sum_{t=1}^T \left[ -\mathbb{E}_{\mathbf{p}}[f_t(\mathbf{w})] - \frac{1}{\eta} \ln \mathbb{E}_{\mathbf{p}_t}[e^{-\eta f_t(\mathbf{w})}] \right] = \frac{1}{\eta} \left( KL(\mathbf{p} \parallel \mathbf{p}_1) - KL(\mathbf{p} \parallel \mathbf{p}_{T+1}) \right).$$

Now adding  $\sum_{t=1}^T f_t(\mathbf{w}_t)$  to both sides, this further gives:

$$\begin{aligned}
 & \sum_{t=1}^T \left[ f_t(\mathbf{w}_t) - \mathbb{E}_{\mathbf{p}}[f_t(\mathbf{w})] \right] = \frac{1}{\eta} \left( KL(\mathbf{p} \parallel \mathbf{p}_1) - KL(\mathbf{p} \parallel \mathbf{p}_{T+1}) \right) + \sum_{t=1}^T \left( f_t(\mathbf{w}_t) + \frac{1}{\eta} \ln \mathbb{E}_{\mathbf{p}_t}[e^{-\eta f_t(\mathbf{w})}] \right) \\
 & \implies \sum_{t=1}^T \left[ f_t(\mathbf{w}_t) - \mathbb{E}_{\mathbf{p}}[f_t(\mathbf{w})] \right] \leq \frac{KL(\mathbf{p} \parallel \mathbf{p}_1)}{\eta} + \sum_{t=1}^T \left( f_t(\mathbf{w}_t) + \frac{1}{\eta} \ln \mathbb{E}_{\mathbf{p}_t}[e^{-\eta f_t(\mathbf{w})}] \right) \\
 & \implies \sum_{t=1}^T \mathbb{E}_{\mathbf{w}_t \sim \mathbf{p}_t} \left[ f_t(\mathbf{w}_t) - \mathbb{E}_{\mathbf{p}}[f_t(\mathbf{w})] \right] \leq \frac{KL(\mathbf{p} \parallel \mathbf{p}_1)}{\eta} + \frac{1}{\eta} \sum_{t=1}^T \mathbb{E}_{\mathbf{w}_t \sim \mathbf{p}_t} \left[ \eta f_t(\mathbf{w}_t) + \ln \mathbb{E}_{\mathbf{p}_t}[e^{-\eta f_t(\mathbf{w})}] \right] \\
 & \implies \sum_{t=1}^T \left[ \langle (\mathbf{p}_t - \mathbf{p}), f_t \rangle \right] \leq \frac{KL(\mathbf{p} \parallel \mathbf{p}_1)}{\eta} + \frac{1}{\eta} \sum_{t=1}^T \mathbb{E}_{\mathbf{w}_t \sim \mathbf{p}_t} \left[ \eta f_t(\mathbf{w}_t) + \mathbb{E}_{\mathbf{p}_t}[e^{-\eta f_t(\mathbf{w})}] - 1 \right] \\
 & \leq \frac{KL(\mathbf{p} \parallel \mathbf{p}_1)}{\eta} + \frac{1}{\eta} \sum_{t=1}^T \mathbb{E}_{\mathbf{w}_t \sim \mathbf{p}_t} \left[ \eta f_t(\mathbf{w}_t) + 1 - \eta \mathbb{E}_{\mathbf{w} \sim \mathbf{p}_t}[f_t(\mathbf{w})] + \mathbb{E}_{\mathbf{w} \sim \mathbf{p}_t} \left[ \frac{\eta^2 f_t^2(\mathbf{w})}{2} \right] - 1 \right] \\
 & = \frac{KL(\mathbf{p} \parallel \mathbf{p}_1)}{\eta} + \frac{\eta}{2} \sum_{t=1}^T \langle \mathbf{p}_t, f_t^2 \rangle,
 \end{aligned}$$

which concludes the proof. The last two inequalities above follow from  $\ln s \leq s - 1$ ,  $\forall s > 0$  and  $e^{-s} \leq 1 - s + s^2/2$ ,  $\forall s > 0$ .  $\square$

**Lemma 11.** For any convex and  $L$ -Lipschitz function,  $\ell : \mathcal{G}_t \mapsto \mathbb{R}_+$ , such that  $\mathcal{G}_t = [\alpha, \beta] \subseteq \mathbb{R}$ ,  $\mathbf{q} \in \mathcal{Q}_t$ , and any  $y \in \mathcal{G}_t$ , the kernel  $\mathbf{K}'_t : \mathcal{G}_t \times \mathcal{G}_t \mapsto \mathbb{R}_+$  satisfies:

1. The function  $\mathbf{K}'_t \ell(\cdot)$  is  $L$ -Lipschitz.
2.  $\mathbf{K}'_t \ell(y) \leq (1 - \lambda) \langle \mathbf{K}'_t \mathbf{q}, \ell \rangle + \lambda \ell(y) + 3\epsilon L$ , where  $\lambda$  is a constant.
3. For any  $\mathbf{q} \in \mathcal{Q}_t$ , define operator  $\mathbf{K}'_t^{(2)} \mathbf{q} : \mathcal{G}_t \mapsto \mathbb{R}$  as:

$$\mathbf{K}'_t^{(2)} \mathbf{q}(y) := \int_{y' \in \mathcal{G}_t} (\mathbf{K}'_t(y, y'))^2 d\mathbf{q}(y') \quad \forall y \in \mathcal{G}_t,$$

$$\text{then } \int_{y \in \mathcal{G}_t} \frac{\mathbf{K}'_t^{(2)} \mathbf{q}(y)}{\mathbf{K}'_t \mathbf{q} y} dy \leq B, \text{ where } B = 2 \left( 1 + \ln \frac{1}{\epsilon} + \ln(\beta - \alpha) \right).$$

*Proof.* 1. For the first part, let us denote  $\bar{y} = \mathbb{E}_{y \sim \mathbf{q}}[y]$ . Then note that:

$$\mathbf{K}'_t \ell(y) = \langle \mathbf{K}'_t \delta_y, \ell \rangle = \begin{cases} \mathbb{E}_{U \sim \text{unif}[0,1]} [\ell(U\bar{y} + (1-U)y)], & \text{if } |y - \bar{y}| \geq \epsilon \\ \mathbb{E}_{U \sim \text{unif}[0,1]} [\ell(\bar{y} - \epsilon U)], & \text{if } |y - \bar{y}| < \epsilon \end{cases}, \quad (15)$$

which immediately implies the function  $\mathbf{K}'_t \ell(\cdot)$  has the same Lipschitz parameter that of  $\ell(\cdot)$ .

2. We prove this part considering two cases separately:

**Case 1.**  $|y - \bar{y}| \geq \epsilon$ : By construction of  $\mathbf{K}'_t$  (see Definition 4), we note that expectation of  $y$  w.r.t.  $\mathbf{q}$  and  $\mathbf{K}'_t \mathbf{q}$ , i.e. respectively  $\bar{y} = \mathbb{E}_{y \sim \mathbf{q}}[y]$  and  $\mathbb{E}_{y \sim \mathbf{K}'_t \mathbf{q}}[y]$  can differ at most by  $2\epsilon$ , i.e.  $|\mathbb{E}_{y \sim \mathbf{q}}[y] - \mathbb{E}_{y \sim \mathbf{K}'_t \mathbf{q}}[y]| \leq 2\epsilon$  (Bubeck et al., 2017). We write,  $\mathbb{E}_{y \sim \mathbf{K}'_t \mathbf{q}}[y] = \mathbb{E}_{y \sim \mathbf{q}}[y] + \psi$ , clearly  $\psi \in [-2\epsilon, 2\epsilon]$ . Hence:

$$\begin{aligned}
 \ell(\bar{y}) &= \ell(\mathbb{E}_{y \sim \mathbf{K}'_t \mathbf{q}}[y] - \psi) \\
 &\leq \ell \left( \int_{y \in \mathcal{G}_t} y \mathbf{K}'_t \mathbf{q}(y) dy \right) + \psi L \leq \int_{y \in \mathcal{G}_t} \ell(y) \mathbf{K}'_t \mathbf{q}(y) dy + 2\epsilon L
 \end{aligned}$$

$$= \langle \mathbf{K}'_t \mathbf{q}, \ell \rangle + 2\epsilon L \quad (16)$$

where the first inequality follows using the  $L$ -lipschitzness of  $\ell$  and the second inequality follows using Jensen's inequality (since  $\ell$  is convex). Now consider the case  $|y - \bar{y}| \geq \epsilon$  in (15):

$$\begin{aligned} \mathbf{K}'_t{}^* \ell(y) &= \mathbb{E}_{U \sim \text{unif}[0,1]} [\ell(U\bar{y} + (1-U)y)] \leq \frac{\ell(\bar{y}) + \ell(y)}{2} \\ &\stackrel{\text{by (16)}}{\leq} \frac{\langle \mathbf{K}'_t \mathbf{q}, \ell \rangle + \ell(y)}{2} + \epsilon L \end{aligned}$$

This shows that for this case the claim of Part (2) holds for  $\lambda = \frac{1}{2}$ .

**Case 2.**  $|y - \bar{y}| < \epsilon$ : Note  $\bar{y} - \epsilon U \in [\bar{y} - \epsilon, \bar{y}]$  in (15). And in this case  $\ell(\bar{y}) \leq \ell(y) + \epsilon L$ . Using the fact that  $\ell(\cdot)$  is convex and  $L$ -lipschitz, by similar arguments used to obtain (16) above, we have:

$$\mathbf{K}'_t{}^* \ell(y) \leq \ell(\bar{y}) + \epsilon L = \ell(\bar{y})/2 + \ell(\bar{y})/2 + \epsilon L \leq \langle \mathbf{K}'_t \mathbf{q}, \ell \rangle / 2 + (\ell(y) + \epsilon L) / 2 + 2\epsilon L$$

which implies for this case as well, the claim of Part (2) holds for  $\lambda = 1/2$ .

3. For this part, note that:

$$\begin{aligned} \int_{y \in \mathcal{G}_t} \frac{\mathbf{K}'_t{}^{(2)} \mathbf{q}(y)}{\mathbf{K}'_t \mathbf{q}(y)} dy &\stackrel{(a)}{\leq} \int_{\alpha}^{\beta} \frac{1}{\max(|y - \bar{y}|, \epsilon)} dy \\ &= \int_{\alpha}^{\bar{y}-\epsilon} \frac{1}{\max(|y - \bar{y}|, \epsilon)} dy + \int_{\bar{y}-\epsilon}^{\bar{y}+\epsilon} \frac{1}{\max(|y - \bar{y}|, \epsilon)} dy + \int_{\bar{y}+\epsilon}^{\beta} \frac{1}{\max(|y - \bar{y}|, \epsilon)} dy \\ &= \int_{\alpha}^{\bar{y}-\epsilon} \frac{1}{\bar{y} - y} dy + \int_{\bar{y}-\epsilon}^{\bar{y}+\epsilon} \frac{1}{\epsilon} dy + \int_{\bar{y}+\epsilon}^{\beta} \frac{1}{y - \bar{y}} dy \\ &= \frac{1}{\epsilon} \int_{\bar{y}-\epsilon}^{\bar{y}+\epsilon} dy + 2 \ln \frac{1}{\epsilon} + \ln(\beta - \bar{y}) + \ln(\bar{y} - \alpha) \\ &\leq 2 \left( 1 + \ln \frac{1}{\epsilon} + \ln(\beta - \alpha) \right) \quad (\text{since } \alpha \leq \bar{y} \leq \beta) \end{aligned}$$

where (a) follows noting  $\mathbf{K}'_t(y, y') \leq \frac{1}{\max(|y - \bar{y}|, \epsilon)}$ ,  $\forall y, y' \in \mathcal{G}_t$  which implies  $\mathbf{K}'_t{}^{(2)} \mathbf{q}(y) \leq \frac{\mathbf{K}'_t \mathbf{q}(y)}{\max(|y - \bar{y}|, \epsilon)}$ .  $\square$

### A.3. Proof of Lemma 6

*Proof.* For any  $\ell_t : \mathbb{R} \rightarrow [0, C]$ ,  $t \in [T]$ , define  $\hat{\ell}_t : \mathbb{R} \mapsto [0, C]$  such that  $\hat{\ell}_t(y) = \mathbb{E}_{u \sim \mathcal{U}(\mathcal{B}_1(1))} \ell_t(y + \delta u)$ , for any  $y \in \mathbb{R}$ .

Let us also define  $\hat{f}_t(\mathbf{w}) = \hat{\ell}_t(g_t(\mathbf{w}; \mathbf{x}_t))$ ,  $\forall \mathbf{w} \in \mathcal{W}$ . Let  $y_t = g_t(\mathbf{w}_t; \mathbf{x}_t)$ ,  $\forall t \in [T]$ .

Then given any fixed  $\mathbf{w} \in \mathcal{W}$  and  $\mathbf{x} \in \mathbb{R}^d$ , by chain rule  $\nabla_{\mathbf{w}} \hat{f}_t(\mathbf{w}) = \frac{d\hat{f}_t(y)}{dy} \nabla_{\mathbf{w}}(g_t(\mathbf{w}; \mathbf{x}_t)) = \frac{d\hat{\ell}_t(y)}{dy} \nabla_{\mathbf{w}}(g_t(\mathbf{w}_t; \mathbf{x}_t))$ .

Consider the RHS of the lemma equality:

$$\begin{aligned} &\mathbb{E}_{u \sim \mathcal{U}(\mathcal{S}_1(1))} \left[ \frac{1}{\delta} \ell_t(g_t(\mathbf{w}_t; \mathbf{x}_t) + \delta u) u \mid \mathbf{w}_t \right] \nabla_{\mathbf{w}}(g_t(\mathbf{w}_t; \mathbf{x}_t)) \\ &= \frac{d\hat{\ell}_t(y_t)}{dy_t} \nabla_{\mathbf{w}}(g_t(\mathbf{w}_t; \mathbf{x}_t)) = \nabla_{\mathbf{w}} \hat{f}_t(\mathbf{w}_t) = \nabla_{\mathbf{w}} \mathbb{E}_u [\ell_t(g_t(\mathbf{w}_t; \mathbf{x}_t) + \delta u)], \end{aligned}$$

where the first equality is due to Lemma 1 of (Flaxman et al., 2005) applied to the 1-dimensional ball  $\mathcal{B}_1(1)$ .  $\square$

### A.4. Proof of Lemma 7

*Proof.* We start by recalling Lemma 2 of (Flaxman et al., 2005) that uses the online gradient descent analysis by (Zinkevich, 2003) with unbiased random gradient estimates. We restate the result below for convenience:

**Lemma 12** (Lemma 2, (Flaxman et al., 2005)). *Let  $S \subset \mathcal{B}_d(R) \subset \mathbb{R}^d$  be a convex set,  $f_1, f_2, \dots, f_T : S \mapsto \mathbb{R}$  be a sequence of convex, differentiable functions. Let  $\mathbf{w}_1, \mathbf{w}_2, \dots, \mathbf{w}_T \in S$  be a sequence of predictions defined as  $\mathbf{w}_1 = 0$  and  $\mathbf{w}_{t+1} = \mathbf{P}_S(\mathbf{w}_t - \eta h_t)$ , where  $\eta > 0$ , and  $h_1, h_2, \dots, h_T$  are random variables such that  $\mathbb{E}[h_t | \mathbf{w}_t] = \nabla f_t(\mathbf{w}_t)$ , and  $\|h_t\|_2 \leq G$ , for some  $G > 0$  then, for  $\eta = \frac{R}{G\sqrt{T}}$  the expected regret incurred by above prediction sequence is:*

$$\mathbb{E} \left[ \sum_{t=1}^T f_t(\mathbf{w}_t) \right] - \min_{\mathbf{w} \in S} \sum_{t=1}^T f_t(\mathbf{w}) \leq RG\sqrt{T}.$$

Coming back to our problem setup, let us first denote  $\hat{f}_t(\mathbf{w}) = \hat{\ell}_t(g_t(\mathbf{w}; \mathbf{x}_t))$ , for all  $\mathbf{w} \in \mathcal{W}$ ,  $t \in [T]$  (recall from the proof of Lemma 6, we define  $\hat{\ell}_t : \mathbb{R} \mapsto [0, C]$  such that  $\hat{\ell}_t(y) = \mathbb{E}_{u \sim \mathcal{U}(\mathcal{B}_1(1))} \ell_t(y + \delta u)$ , for any  $y \in \mathbb{R}$ ). We can now apply Lemma 12 in the setting of Algorithm 3 on the sequence of convex (by **(A1) (ii)**), differentiable functions  $\hat{f}_1, \hat{f}_2, \dots, \hat{f}_T : \mathcal{W}_\alpha \mapsto [0, C]$ , with  $h_t = \frac{1}{\delta} (\ell_t(a_t)u) \nabla g_t(\mathbf{w}_t; \mathbf{x}_t)$ , with  $u \sim \mathcal{B}_1(1)$  (note that Lemma 6 implies  $\mathbb{E}[h_t | \mathbf{w}_t] = \nabla_{\mathbf{w}} \hat{f}_t(\mathbf{w}_t) = \nabla_{\mathbf{w}} \mathbb{E}_u [\ell_t(g_t(\mathbf{w}_t; \mathbf{x}_t) + \delta u)]$ ). We get:

$$\mathbb{E} \left[ \sum_{t=1}^T \hat{f}_t(\mathbf{w}_t) \right] - \min_{\mathbf{w} \in \mathcal{W}_\alpha} \sum_{t=1}^T \hat{f}_t(\mathbf{w}) \leq \frac{WDC\sqrt{T}}{\delta}, \quad (17)$$

as in this case  $R \leq (1 - \alpha)W < W$ , and, by **(A3) (ii)**,  $\|h_t\| = \|\frac{1}{\delta} (\ell_t(a_t)u) \nabla(g_t(\mathbf{w}_t; \mathbf{x}_t))\| \leq \frac{DC}{\delta}$ , so  $G = \frac{DC}{\delta}$ , and  $\eta = \frac{W\delta}{DC\sqrt{T}}$ . Further, since  $\ell_t(\cdot)$ s are assumed to be  $L$ -Lipschitz, (17) yields:

$$\begin{aligned} & \mathbb{E} \left[ \sum_{t=1}^T (f_t(\mathbf{w}_t) - \delta L) \right] - \min_{\mathbf{w} \in \mathcal{W}_\alpha} \sum_{t=1}^T (f_t(\mathbf{w}) + \delta L) \leq \frac{WDC\sqrt{T}}{\delta}, \\ \implies & \mathbb{E} \left[ \sum_{t=1}^T f_t(\mathbf{w}_t) \right] - \min_{\mathbf{w} \in \mathcal{W}_\alpha} \sum_{t=1}^T f_t(\mathbf{w}) \leq \frac{WDC\sqrt{T}}{\delta} + 2\delta LT \\ \implies & \mathbb{E} \left[ \sum_{t=1}^T f_t(\mathbf{w}_t) \right] - \min_{\mathbf{w} \in \mathcal{W}} \sum_{t=1}^T f_t(\mathbf{w}) \leq \frac{WDC\sqrt{T}}{\delta} + 2\delta LT + \alpha LT, \\ \implies & \mathbb{E} \left[ \sum_{t=1}^T f_t(\mathbf{w}_t) \right] - \min_{\mathbf{w} \in \mathcal{W}} \sum_{t=1}^T f_t(\mathbf{w}) \leq \frac{WDC\sqrt{T}}{\delta} + 3\delta LT, \end{aligned}$$

setting  $\alpha = \delta$ . The claim follows minimizing the RHS above w.r.t.  $\delta$ . Setting  $\delta = \left( \frac{WDC}{3L\sqrt{T}} \right)^{1/2}$  gives:

$$\mathbb{E}[\mathcal{R}_T(\mathcal{A})] = \mathbb{E} \left[ \sum_{t=1}^T f_t(\mathbf{w}_t) \right] - \min_{\mathbf{w} \in \mathcal{W}} \sum_{t=1}^T f_t(\mathbf{w}) \leq 2\sqrt{3WLDCT}^{3/4},$$

which concludes the proof. □

## B. Appendix for Simulations (Section 5)

**Implementation details of Algorithm 2.** The main challenge in implementing Kernelized Exponential Weights for PBCO (Algorithm 2) is to handle the continuous ‘action space’  $\mathcal{W}$ ; in particular, to maintain and update the probability distribution  $\mathbf{p}_t$  over  $\mathcal{W}$ , and to sample from  $\mathbf{p}_t$  given  $y_t$  at round  $t$ . Towards this we use an epsilon-net trick to discretize  $\mathcal{W}$  into finitely many points—specifically, since we choose  $\mathcal{W} = \mathcal{B}_d(1)$ , we discretize the  $[0, 1]$  interval every  $d$  direction with a grid size of  $O(1/d)$ , and consider only the points inside  $\mathcal{B}_d(1)$ . This reduces the action space  $\mathcal{W}$  into finitely many points (say  $N$ ), and we now proceed by maintaining and updating probabilities on every such discrete point following the steps of Algorithm 2 (we initialize  $\mathbf{p}_1 \leftarrow 1/N$  for all  $N$  points in the epsilon net).
